# Supplementary material for: Robust Association between Acute Kidney Injury after Radical Nephrectomy and Long-term Renal Function
Source: PubMed Central journal article supplement (PMC7141119; doi:10.3390/jcm9030619), 2020-02-25
Supplement: jcm-09-00619-s001.pdf [file jcm-09-00619-s001.pdf]

Supplementary Materials

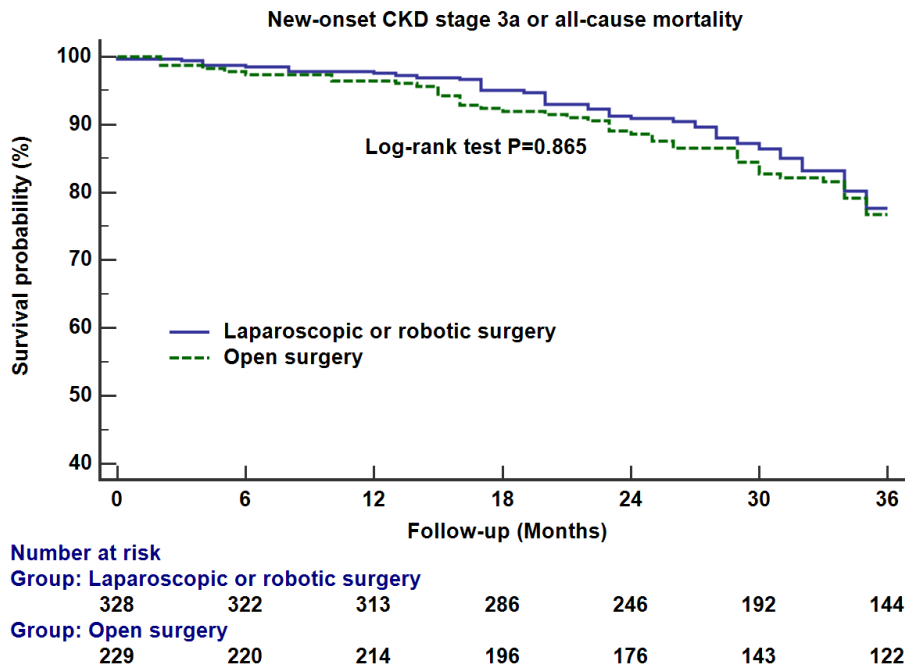

**Figure S1.** Kaplan-Meier survival curve analysis for new-onset chronic kidney disease stage 3a or higher (estimated glomerular filtration rate <60 ml/min/1.73m<sup>2</sup>) or all-cause mortality as the primary outcome between different type of surgical procedure groups. The result of Log-rank test is shown on the figure. The numbers of patients who had follow-up eGFR values at each time point were shown in the bottom of the figure.

**Table S1.** The number of patients who had follow-up values of renal function.

|                   | 6 months   | 12 months  | 18 months  | 24 months  | 30 months  | 36 months  |
|-------------------|------------|------------|------------|------------|------------|------------|
| Follow-up         | 542 (97.1) | 527 (94.4) | 482 (86.4) | 422 (75.6) | 335 (60.0) | 261 (46.8) |
| Lost to follow-up | 16 (2.9)   | 31 (5.6)   | 76 (13.6)  | 136 (24.4) | 223 (40.0) | 297 (53.2) |

Data are presented as number (%).

**Table S2.** Comparison of the incidence of acute kidney injury between the types of surgical procedures. .

|                  | Open surgery<br>(n=329) | Laparoscopic or<br>robotic surgery<br>(n=229) | P-value |
|------------------|-------------------------|-----------------------------------------------|---------|
| No AKI           | 164 (49.8)              | 153 (66.8)                                    |         |
| AKI stage 1      | 103 (31.3)              | 57 (24.9)                                     | <0.001* |
| AKI stage 2 or 3 | 62 (18.8)               | 19 (8.3)                                      |         |
| AKI all stage    | 165 (50.2)              | 76 (33.2)                                     | <0.001  |

Data are presented as number (%). AKI = acute kidney injury. P-values are the results of the chi-square test. \* Comparing the incidence of no AKI, AKI stage 1, and stage 2 or 3 between surgical procedure groups.

**Table S3.** Comparison of the incidence of complications between the patients with and without acute kidney injury according to Clavien-Dindo classification.

|            | <b>No AKI group<br/>(n=317)</b> | <b>AKI group<br/>(n=241)</b> | <b>P-value</b> |
|------------|---------------------------------|------------------------------|----------------|
| Grade I    | 4 (1.3)                         | 8 (3.3)                      | 0.104          |
| Grade II   | 3 (0.9)                         | 1 (0.4)                      |                |
| Grade IIIa | 3 (0.9)                         | 1 (0.4)                      |                |
| Grade IIIb | 2 (0.6)                         | -                            |                |
| Grade IVa  | 1 (0.3)                         | 2 (0.8)                      |                |
| Grade IVb  | -                               | -                            |                |
| Grade V    | -                               | -                            |                |

Data are presented as number (%). AKI = acute kidney injury. P-values are the result of the chi-square test between no-AKI and AKI groups.
